# Supplementary material
Source: ML conference proceedings conference paper supplement (https://aclanthology.org/2021.findings-acl.211)
Supplement: OptionalSupplementaryMaterial [file 2021.findings-acl.211.OptionalSupplementaryMaterial.zip]

| Type                   | Description                                                                                                                                                                                                 | Examples                                                                                                                                                                                                                                                                                                                                                                                                                                                                                                                                                                                                                                                      |
|------------------------|-------------------------------------------------------------------------------------------------------------------------------------------------------------------------------------------------------------|---------------------------------------------------------------------------------------------------------------------------------------------------------------------------------------------------------------------------------------------------------------------------------------------------------------------------------------------------------------------------------------------------------------------------------------------------------------------------------------------------------------------------------------------------------------------------------------------------------------------------------------------------------------|
| LAW<br>Propose         | A PROPOSE event occurs when an actor (Agent) introduces a bill, proposition, or treaty which benefits a group of people (Beneficial).                                                                       | Below we give the salient points of the bill of an entertainment recently <b>given</b> in the interest of a certain church about to be organized in a certain town in New Jersey.<br>The bill <b>introduced</b> in Congress last week by the congressman from North Carolina , to abolish the 15th amendment. It 's only effect will be to create support for the bill of congressman Crumpacker which <b>proposes</b> a reduction of representation in those States                                                                                                                                                                                          |
| LAW<br>Approve         | An APPROVE event occurs when a bill or order (Object) is passed by either the head of the government or a representative committee (Agent).                                                                 | Be it <b>enacted</b> by the General Assembly of Maryland.<br><br>Vermont has <b>passed</b> her Liberty Bill , New York has under discussion , and Massachusetts will soon report and <b>pass</b> her Act .<br>But it is said that for the Government to <b>adopt</b> the abolition policy, would involve the loss of the support of the Union men of the Border Slave States.                                                                                                                                                                                                                                                                                 |
| LAW<br>Repeal          | A REPEAL event occurs when an active law (Object) is completely repealed by a state actor (Agent).                                                                                                          | ... that I determined to revoke the act of the Federal Constituent Assembly , whereby Slavery was <b>abolished</b> .<br>Even the New York Tribune protests against making this war for the <b>destruction</b> of slavery, and insists that such a war would alienate a large body of the Northern people at present who adhere to the Government in the prosecution of the war.<br>They want to se the Government march a powerful array into the traitorous States, proclaim liberty to every slave, and <b>wipe out</b> the last vestige of that barbarous system from the land ...                                                                         |
| CONFLICT<br>Protest    | A PROTEST event occurs when people (Agent) come into a public area to demand some action. PROTEST events include, but are not limited to, protests, sit-ins, and riots as the result of a previous protest. | Almost simultaneously with the appearance of the minstrels there arose from every kennel in the neighborhood timely protest <b>barked</b> forth vigorously by a hundred curs, who, in common with their masters, cursed their common luck.<br>It has attempted to supplant Government with anarchy, and the fury of a brutal <b>mob</b> for the beneficent operation of law, and the legally appointed law-makers.<br>...while the majority of the men were absent at a public <b>demonstration</b> at Myrtle-avenue Park, in another part of the city.                                                                                                       |
| CONFLICT<br>Attack     | An ATTACK event occurs when a person or a organization (Agent) performs an violent act causing harm or damage to another person or organization (Patient).                                                  | Make the slave first, midst, and last Follow no longer the partial and side issues; <b>strike</b> for the abolition of slavery.<br>... and hovering about Williamsport in an unaccountable manner - while the rebel troops are <b>burning , destroying</b> , pressing loyal men into service , or driving them from the houses they hoped to possess , and the wheat-fields they expected to reap , under the protecting folds of the Federal flag .<br>The States which <b>rebelled</b> , after having been most thoroughly <b>whipped</b> in a great war , came back into the Union upon their promises to abide by the Constitution and Laws of the same . |
| CONFLICT<br>Injure-Die | A Injure-Die event is defined as a death or wound of a person (Patient) which is the result of a violence event by another person (Agent).                                                                  | The life of loyal men are being <b>sacrificed</b> by scores, and will, by and by, be <b>sacrificed</b> by thousands.<br>Why should the nation <b>pour out its blood</b> and lavish its treasure by the million, consent to protect and preserve the guilty cause of all its troubles?<br>Our loss is estimated at two hundred <b>killed</b> and <b>wounded</b> .                                                                                                                                                                                                                                                                                              |

Table 7: Event types with their descriptions and examples in the BRAD dataset (to be continued in Table 8). Event trigger words are shown in bold.

| Type                   | Description                                                                                                                                                                                                                       | Examples                                                                                                                                                                                                                                                                                                                                                                                                                                                                                                                                           |
|------------------------|-----------------------------------------------------------------------------------------------------------------------------------------------------------------------------------------------------------------------------------|----------------------------------------------------------------------------------------------------------------------------------------------------------------------------------------------------------------------------------------------------------------------------------------------------------------------------------------------------------------------------------------------------------------------------------------------------------------------------------------------------------------------------------------------------|
| CONFLICT<br>Other      | Conflict Other events are reserved for events that are related to conflicts, but not classified as one of the conflict event types above, including declaring war, threatening someone, forming an army, a movement, and a march. | Let the slaves and free colored people be <b>called into service</b> , and <b>formed</b> into a liberating army, to march into the South ...<br>Their efforts in this direction have been crowned by entire <b>success</b> .<br>He had <b>called</b> loud and earnestly upon the Government for reinforcements; but the Government was practically deaf to the <b>call</b> , and left him and his brave companions either to perform a miracle, or to be completely overwhelmed by superior numbers.                                               |
| JUSTICE<br>Arrest-Jail | An Arrest-Jail Event occurs when the movement of a person (Patient) is constrained by a state actor (Agent).                                                                                                                      | It appears that he obtained his information direct from German where a supposed agent of the company had been <b>arrested</b> , having in his possession incriminating documents.<br>It is said to be possible to <b>imprison</b> a man for debt in Massachusetts.<br>He <b>put her in jail</b> at Eastville and she stayed there for some time .                                                                                                                                                                                                  |
| JUSTICE<br>Sentence    | A SENTENCE Event takes place when a punishment for a person or an organization (Patient) is issued by a state actor (Agent).                                                                                                      | ... and any person so offending shall be guilty of a felony, and shall, on conviction, be <b>sentenced to confinement</b> in the penitentiary of this State, for a period not less than ten nor more than twenty years from the time of <b>sentence</b> pronounced on such person.<br>If any slave or servant be convicted of any crime the punishment whereof may be death or <b>confinement</b> in the penitentiary<br>..., but that it has been promptly put down and the guilty parties summarily <b>punished</b> .                            |
| JUSTICE<br>Execute     | An EXECUTE Event occurs when the life of a person (Patient) is taken by a state actor (Agent).                                                                                                                                    | Hector Grant James Horney, and Esther Anderson, white servants, were <b>executed</b> at Chester, Kent county.<br>All these , if the demand of the Administration and its friends is gratified , are to be <b>hanged</b> ; for the <b>punishment</b> of treason by our law is <b>death</b> , ...<br>He made some confessions, and managed finally to escape, but was arrested, taken to El Dorado, tried, and <b>shot</b> - not, however, by regular process.                                                                                       |
| HUMANITY<br>Deprive    | An DEPRIVE Event occurs when someone's right (Patient) is taken away, disrespect, or discouraged in any form of expression including but not limited to law, action, and statement.                                               | We thank Dr. CROFTS for the assurance of his sympathy, and hope often to receive his earnest words in behalf of our <b>enslaved</b> people.<br>Before the <b>slaved</b> is freed, this and a hundred other plans will be critically canvassed , and the discussion of each will elicit some truth .<br>... shall the four millions slaves , now <b>robbed</b> of all their rights, and <b>degraded</b> to a level with brute beast...                                                                                                              |
| HUMANITY<br>Endow      | An ENDOW Event occurs when someone's right is enriched or appreciated in any form of expression including but not limited to law, action, action and statement.                                                                   | And as for lynching - let all the officers of the law, with all the powers of the law, <b>defend</b> the rights and life of every prisoner.<br>Before the slaved is <b>freed</b> , this and a hundred other plans will be critically canvassed<br>They are going into every community which <b>offers freedom</b> and <b>protection</b> to their citizens , where law is justly administered and where the rights of man are <b>respected</b> ; and there are many such sections in this country ; there will be the future homes of the Negroes . |

Table 8: Event types with their descriptions and examples in the BRAD dataset. Event trigger words are shown in bold.

| Event               | Argument Role | Entity Type | Description                                               | Examples                                                                                                                                                                                                                   |
|---------------------|---------------|-------------|-----------------------------------------------------------|----------------------------------------------------------------------------------------------------------------------------------------------------------------------------------------------------------------------------|
| LAW Propose         | Agent         | PER<br>ORG  | The person or organization who proposes the law           | The <b>resolutions</b> were <b>proposed</b> by the <b>gentleman</b> from Ohio. <b>Slavery</b> has been <b>brought</b> into the <b>House</b> .                                                                              |
|                     | Beneficiary   | PER<br>ORG  | The person or organization who benefits from the proposal |                                                                                                                                                                                                                            |
|                     | Object        | DOC         | The proposed law                                          |                                                                                                                                                                                                                            |
|                     | Time          | TIME        | When the proposal takes place                             |                                                                                                                                                                                                                            |
|                     | Location      | GPE         | Where the proposal takes place                            |                                                                                                                                                                                                                            |
| LAW Approve         | Agent         | PER<br>ORG  | The person or organization who approves the law           | <b>Freedom</b> to the <b>slave</b> should <b>now</b> be <b>proclaimed</b> from the <b>Capitol</b> .<br>The <b>act</b> was duly <b>approved</b> by the <b>Executive</b> , published, and announced to the civilized words.  |
|                     | Beneficiary   | PER<br>ORG  | The person or organization who benefit from this approval |                                                                                                                                                                                                                            |
|                     | Object        | DOC         | The approved law                                          |                                                                                                                                                                                                                            |
|                     | Time          | TIME        | When the approval takes place                             |                                                                                                                                                                                                                            |
|                     | Location      | GPE         | Where the approval takes place                            |                                                                                                                                                                                                                            |
| LAW Repeal          | Agent         | PER<br>ORG  | The person or organization who repeals the law            | <b>They</b> shall <b>strike down</b> <b>Slavery</b> .<br>... we can not see why the <b>institution of private property</b> was to be <b>abolished</b> .                                                                    |
|                     | Beneficiary   | PER<br>ORG  | The person or organization who benefits from this repeal  |                                                                                                                                                                                                                            |
|                     | Object        | DOC         | The repealed law                                          |                                                                                                                                                                                                                            |
|                     | Time          | TIME        | When the repeal takes place                               |                                                                                                                                                                                                                            |
|                     | Location      | GPE         | Where the repeal takes place                              |                                                                                                                                                                                                                            |
| CONFLICT Protest    | Agent         | PER<br>ORG  | The person or organization who protests                   | The red cap was <b>paraded</b> through <b>Cape Haytien</b> .<br>The <b>men</b> were present at a public <b>demonstration</b> in <b>Brooklyn</b> .                                                                          |
|                     | Patient       | ORG         | The organization that the agent protest against           |                                                                                                                                                                                                                            |
|                     | Time          | TIME        | When the protest takes place                              |                                                                                                                                                                                                                            |
|                     | Location      | GPE         | Where the protest takes place                             |                                                                                                                                                                                                                            |
| CONFLICT Attack     | Agent         | PER<br>ORG  | The attacking person or organization                      | <b>Fremont</b> is <b>scouring</b> the <b>rebels</b> beyond the borders of <b>Missouri</b> .<br>On Wednesday morning the <b>rebels</b> prepared to <b>storm</b> our works in <b>Plymouth</b> .                              |
|                     | Patient       | PER<br>ORG  | The target of the attack                                  |                                                                                                                                                                                                                            |
|                     | Time          | TIME        | When the attack takes place                               |                                                                                                                                                                                                                            |
|                     | Location      | GPE         | Where the attack takes place                              |                                                                                                                                                                                                                            |
| CONFLICT Injure-Die | Agent         | PER<br>ORG  | The person or organization who attempts to attack or kill | <b>They</b> <b>cut</b> <b>men in half</b> , and pieces from exploded shells, <b>killed</b> and <b>wounded</b> <b>several</b> .<br>Most of the <b>negroes</b> , we regret to hear, are said to have been <b>massacred</b> . |
|                     | Patient       | PER<br>ORG  | The person or organization who is injured or dead         |                                                                                                                                                                                                                            |
|                     | Time          | TIME        | When the injury/death takes place                         |                                                                                                                                                                                                                            |
|                     | Location      | GPE         | Where the injury/death takes place                        |                                                                                                                                                                                                                            |

Table 9: Descriptions and examples of argument roles for each event type in the BRAD dataset (to be continued in Table 10). Event triggers are bold and underlined. Arguments are highlighted using colors that match with their roles.

| Event                  | Argument Role | Entity Type | Description                                                   | Examples                                                                                                                                                                                                              |
|------------------------|---------------|-------------|---------------------------------------------------------------|-----------------------------------------------------------------------------------------------------------------------------------------------------------------------------------------------------------------------|
| CONFLICT<br>Other      | Agent         | PER<br>ORG  | The acting person or organization                             | The poor <b>men</b> of the <b>South</b> have been <b>pressed into the army</b> to fight the battle of slavery.                                                                                                        |
|                        | Patient       | PER<br>ORG  | The person or organization who is the object of the act       |                                                                                                                                                                                                                       |
|                        | Time          | TIME        | When the action takes place                                   |                                                                                                                                                                                                                       |
|                        | Location      | GPE         | Where the action takes place                                  |                                                                                                                                                                                                                       |
| JUSTICE<br>Arrest-Jail | Agent         | PER<br>ORG  | The arresting agent or jailer                                 | A few weeks ago , a <b>man</b> named <b>Hancock</b> was <b>arrested</b> in <b>Union county, Arkansas</b> . Several free colored <b>men</b> were <b>captured</b> with the <b>rebels</b> in <b>Fort Fisher</b> .        |
|                        | Patient       | PER         | The person who is arrested                                    |                                                                                                                                                                                                                       |
|                        | Time          | TIME        | When the arrest/jail takes place                              |                                                                                                                                                                                                                       |
|                        | Location      | GPE         | Where the arrest/jail takes place                             |                                                                                                                                                                                                                       |
| JUSTICE<br>Sentence    | Agent         | PER<br>ORG  | The judge or court                                            | It has been represented there are <b>confined</b> in the <b>Government</b> jail forty-five <b>prisoners</b> , who are not charged with crime, but are represented as being <b>slaves</b>                              |
|                        | Patient       | PER<br>ORG  | The person who is sentenced                                   |                                                                                                                                                                                                                       |
|                        | Time          | TIME        | When the sentencing takes place                               |                                                                                                                                                                                                                       |
|                        | Location      | GPE         | Where the sentencing takes place                              |                                                                                                                                                                                                                       |
| JUSTICE<br>Execute     | Agent         | PER<br>ORG  | The person/organization who orders or carry out the execution | A <b>man</b> by the name of <b>Martin</b> . was tried in <b>El Dorado</b> on a similar charge and <b>hanged</b> . <b>They</b> seized him, and being then convinced of <b>his</b> guilt, <b>shot him</b> in the woods  |
|                        | Patient       | PER         | The person who is executed                                    |                                                                                                                                                                                                                       |
|                        | Time          | TIME        | When the execution takes place                                |                                                                                                                                                                                                                       |
|                        | Location      | GPE         | Where the execution takes place                               |                                                                                                                                                                                                                       |
| HUMANITY<br>Endow      | Agent         | PER<br>ORG  | The person/organization who endows the patient                | It is <b>our</b> right to <b>liberate</b> the <b>slaves</b> of an enemy. ... and <b>give freedom</b> to <b>persons</b> held to labor in the <b>slave states</b> .                                                     |
|                        | Patient       | PER         | The person who is endowed                                     |                                                                                                                                                                                                                       |
|                        | Time          | TIME        | When the endowment takes place                                |                                                                                                                                                                                                                       |
|                        | Location      | GPE         | Where the endowment takes place                               |                                                                                                                                                                                                                       |
| HUMANITY<br>Deprive    | Agent         | PER<br>ORG  | The person/organization who deprives the patient              | <b>They</b> have <b>outraged</b> , and <b>robbed</b> , and <b>murdered</b> our peaceful <b>citizens</b> . ... by the atrocities of the <b>rebels</b> <b>delivering back into bondage</b> thousands of <b>slaves</b> . |
|                        | Patient       | PER         | The person who is deprived                                    |                                                                                                                                                                                                                       |
|                        | Time          | TIME        | When the deprivation takes place                              |                                                                                                                                                                                                                       |
|                        | Location      | GPE         | Where the deprivation takes place                             |                                                                                                                                                                                                                       |

Table 10: Descriptions and examples of argument roles for each event type in the BRAD dataset. Event triggers are bold and underlined. Arguments are highlighted using colors that match with their roles.
